# Supplementary material for: Abnormal gait, reduced locomotor activity and impaired motor coordination in Dgcr2-deficient mice
Source: PubMed Central journal article supplement (PMC5600435; doi:10.1016/j.bbrep.2015.11.015), 2015-11-18
Supplement: mmc2.pdf [file mmc2.pdf]

To view the full contents of this document, you need a later version of the PDF viewer. You can upgrade to the latest version of Adobe Reader from [www.adobe.com/products/acrobat/readstep2.html](http://www.adobe.com/products/acrobat/readstep2.html)

For further support, go to [www.adobe.com/support/products/acrreader.html](http://www.adobe.com/support/products/acrreader.html)
